# Supplementary material for: Gene dosage as a relevant mechanism contributing to the determination of ovarian function in Turner syndrome
Source: PubMed Central journal article supplement — Hum Reprod. 2013 Dec 8;29(2):368–79. doi: 10.1093/humrep/det436 (PMC3896225; doi:10.1093/humrep/det436), 2013-12-08
Supplement: supp_det436_det436supp_figure1.pdf [file supp_det436_det436supp_figure1.pdf]

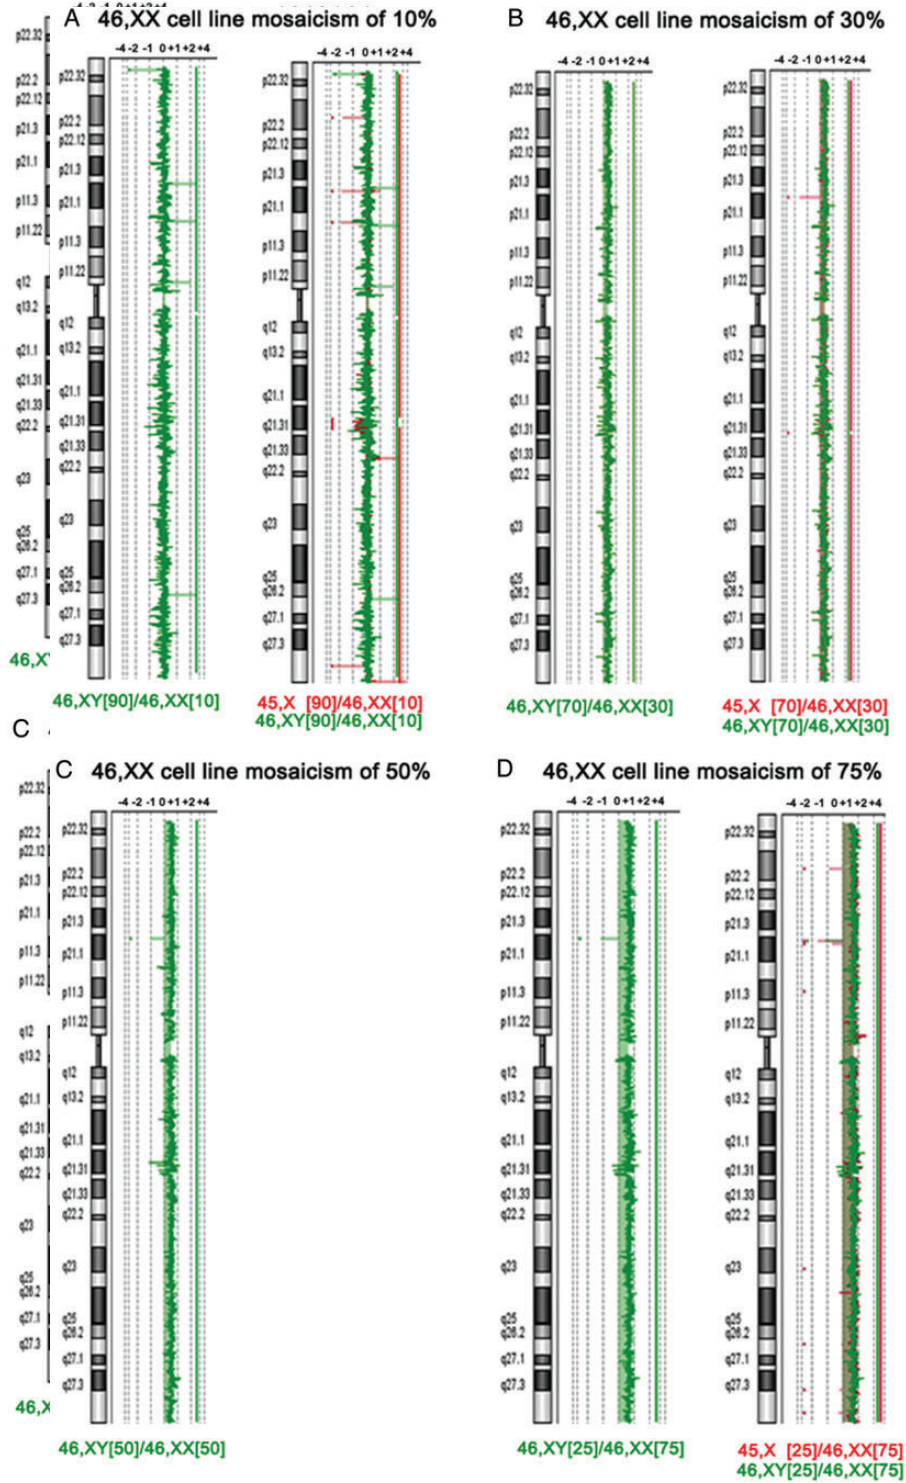

**Supplementary Figure S1** Array-CGH-based X chromosome mosaicism scale. The X chromosome log ratio profile vertical right shift of the mosaicism artificial scale representing 10, 30, 50 and 75% of 46,XX cell line is shown to the left of each panel (green). TS patients mosaicism level was estimated by the overlapping every TS X chromosome array profile (red) to the artificial scale (green) as shown to the right of each panel.
