# Supplementary material for: Gene dosage as a relevant mechanism contributing to the determination of ovarian function in Turner syndrome
Source: PubMed Central journal article supplement — Hum Reprod. 2013 Dec 8;29(2):368–79. doi: 10.1093/humrep/det436 (PMC3896225; doi:10.1093/humrep/det436), 2013-12-08
Supplement: supp_det436_det436supp_table1.pdf [file supp_det436_det436supp_table1.pdf]

**Supplementary Table S1** Clinical features of the six patients with spontaneous pubertal development (SMI-6) and of seven patients with primary amenorrhea (PAI-7) representative of the full PA group.

| Case | Age (y) | Karyotype           | Statural growth    |             | Skeletal anomalies |    |    |    |    |    |    | Soft tissue anomalies |    |    | Visceral anomalies                                                                                                        |                                                      | Others |    |
|------|---------|---------------------|--------------------|-------------|--------------------|----|----|----|----|----|----|-----------------------|----|----|---------------------------------------------------------------------------------------------------------------------------|------------------------------------------------------|--------|----|
|      |         |                     | AH (cm)            | TH (cm)(cm) | GHt                | SM | CV | WA | HP | SN | WN | LH                    | LE | ND | Cardiac <sup>a</sup>                                                                                                      | Renal <sup>b</sup>                                   |        | PN |
| SM1  | 32      | 45,X                | 145.1              | 169.5       | +                  | -  | +  | -  | +  | -  | -  | -                     | -  | -  | Rope accessory tendon in the left ventricle; mitral valve prolapse                                                        | -                                                    | +      |    |
| SM2  | 18      | 45,X                | 140.5              | 154         | -                  | +  | +  | -  | +  | +  | -  | +                     | -  | -  | Mild ectasia of the aortic bulb; tricuspid regurgitation                                                                  | Right renal pelvis hypotonia and left cortical cysts | +      |    |
| SM3  | 15      | 45,X/46,XX          | 144 <sup>c</sup>   | 158.75      | +                  | -  | +  | -  | +  | -  | -  | -                     | -  | +  | Mild ectasia of the aortic bulb                                                                                           | -                                                    | +      |    |
| SM4  | 19      | 45,X/46,XX          | 158.1              | 161.15      | +                  | -  | -  | -  | +  | -  | -  | -                     | -  | -  | -                                                                                                                         | -                                                    | -      | +  |
| SM5  | 15      | 45,X/46,XX          | 157 <sup>c</sup>   | 159.5       | -                  | -  | +  | -  | -  | -  | -  | -                     | -  | -  | -                                                                                                                         | -                                                    | -      | +  |
| SM6  | 15      | 45,X/46,XX          | 150 <sup>c</sup>   | 159.6       | +                  | -  | -  | -  | +  | -  | -  | -                     | -  | -  | Mild ectasia of the aortic bulb                                                                                           | -                                                    | +      |    |
| PA1  | 46      | 45,X                | 130.4              |             | -                  | -  | +  | -  | +  | +  | +  | +                     | +  | +  | Rope accessory tendon in the left ventricle; mitral valve prolapse; anomalous venous return; mild tricuspid regurgitation | -                                                    | +      |    |
| PA2  | 43      | 45,X                | 149.6              | 163.5       | -                  | +  | +  | -  | +  | -  | -  | -                     | -  | -  | Mitral valve prolapse                                                                                                     | -                                                    | +      |    |
| PA3  | 24      | 45,X                | 159.8              | 157.45      | +                  | -  | +  | -  | +  | -  | -  | -                     | -  | -  | -                                                                                                                         | -                                                    | -      | +  |
| PA4  | 35      | 45,X/46,XX          | 142                | 148.5       | +                  | +  | +  | -  | -  | -  | -  | -                     | -  | -  | Rope accessory tendon in the left ventricle                                                                               | Horseshoe kidney                                     | +      |    |
| PA5  | 44      | 45,X/<br>46,X,i(Xq) | 136.7              | 165         | +                  | -  | +  | -  | +  | +  | -  | -                     | -  | -  | Mitral valve prolapse                                                                                                     | -                                                    | +      |    |
| PA6  | 15      | 45,X/<br>46,X,i(Xq) | 152.9 <sup>c</sup> | 165.1       | +                  | -  | +  | -  | +  | -  | -  | -                     | +  | +  | Ectasia of the aortic bulb with aortic regurgitation                                                                      | -                                                    | +      |    |
| PA7  | 33      | 45,X/<br>46,X,i(Xq) | 157.4              | 167.15      | +                  | +  | +  | -  | +  | -  | -  | -                     | -  | -  | Atrial septal defect; mitral valve prolapse; rope accessory tendon in the left ventricle                                  | -                                                    | +      |    |

AH, actual height; CV, cubitus valgus; GHt, growth hormone therapy; HP, high-arched palate; LE, lymphedema; LH, low posterior hairline; ND, nail dysplasia; PN, multiple pigmented nevi; SM, short metacarpal; SN, short neck; TH, target height; WA, wrist abnormality; WN, webbed neck.

<sup>a</sup>Cardiac anomalies were evaluated by echocardiography.

<sup>b</sup>Renal anomalies were evaluated by renal ultrasound.

<sup>c</sup>At the last follow-up the patients had not yet reached their final height.
